# Supplementary material for: Prevalence and prognostic role of L wave and selected clinical and echocardiographic variables in dogs with atrial fibrillation
Source: PubMed Central journal article supplement — J Vet Intern Med. 2022 Dec 8;37(1):47–57. doi: 10.1111/jvim.16584 (PMC9889615; doi:10.1111/jvim.16584), 2022-12-08
Supplement: JVIM-37-47-s001.pdf [file JVIM-37-47-s001.pdf]

**Appendix 1.** Data on cardiovascular drugs aimed at treating the underlying structural cardiac disease administered to 55 dogs with atrial fibrillation at the time of study inclusion.

| <b>ACVIM Stage</b>                                          | <b>B2</b> |         | <b>C</b>                                    |                                   | <b>D</b>                               |         |
|-------------------------------------------------------------|-----------|---------|---------------------------------------------|-----------------------------------|----------------------------------------|---------|
| Cardiac disease (No. of dogs)                               | MMVD (3)  | DCM (2) | MMVD (34)                                   | DCM (13)                          | MMVD (3)                               | DCM (0) |
| Cardiac drug (No. of dogs) [median dose at study inclusion] | None      | None    | Furosemide (22)<br>[4 mg/kg/day]            | Furosemide (2)<br>[2.4 mg/kg/day] | Furosemide (3)<br>[7.6 mg/kg/day]      | -       |
|                                                             |           |         | Pimobendan (18)<br>[0.52 mg/kg/day]         | Pimobendan (1)<br>[0.2 mg/kg/day] | Pimobendan (18)<br>[0.7 mg/kg/day]     |         |
|                                                             |           |         | Benazepril (13)<br>[0.6 mg/kg/day]          |                                   | Benazepril (13)<br>[0.64 mg/kg/day]    |         |
|                                                             |           |         | Spiroinolactone (5)<br>[1.8 mg/kg/day]      |                                   | Enalapril (1)<br>[1.2 mg/kg/day]       |         |
|                                                             |           |         | Enalapril (2)<br>[0.55 mg/kg/day]           |                                   | Spiroinolactone (1)<br>[1.3 mg/kg/day] |         |
|                                                             |           |         | Amlodipine (1)<br>[0.18 mg/kg/day]          |                                   | Torasemide (1)<br>[0.2 mg/kg/day]      |         |
|                                                             |           |         | Hydrochlorothiazide (1)<br>[0.7 mg/kg q48h] |                                   |                                        |         |

ACVIM: American College of Veterinary Internal Medicine; B2: dogs from MMVD group with cardiac enlargement or dogs from DCM group showing left ventricular systolic dysfunction with or without concurrent left ventricular chamber enlargement in diastole; C: dogs with MMVD or DCM and past or present clinical signs of congestive heart failure; D: dogs with MMVD or DCM and clinical signs of congestive heart failure refractory to standard treatment; DCM: dilated cardiomyopathy; MMVD: myxomatous mitral valve disease;
