# Supplementary material for: Prevalence and prognostic role of L wave and selected clinical and echocardiographic variables in dogs with atrial fibrillation
Source: PubMed Central journal article supplement — J Vet Intern Med. 2022 Dec 8;37(1):47–57. doi: 10.1111/jvim.16584 (PMC9889615; doi:10.1111/jvim.16584), 2022-12-08
Supplement: JVIM-37-47-s002.pdf [file JVIM-37-47-s002.pdf]

**Appendix 2.** Data on antiarrhythmic treatment administered to 55 dogs with atrial fibrillation after study inclusion.

| <b>Antiarrhythmic protocol</b>                                                         | <b>Dig+Dil</b>                                                         | <b>Dig</b>                         | <b>OT</b>                                                                                                                                                                                                                                                                                                                             |
|----------------------------------------------------------------------------------------|------------------------------------------------------------------------|------------------------------------|---------------------------------------------------------------------------------------------------------------------------------------------------------------------------------------------------------------------------------------------------------------------------------------------------------------------------------------|
| <b>Medications received</b><br>(No. of dogs)<br>[median dose after<br>study inclusion] | E. r. diltiazem + digoxin (26)<br>[2.1 mg/kg q12h + 0.0039 mg/kg q12h] | Digoxin (15)<br>[0.006 mg/kg q12h] | No antiarrhythmic treatment or<br>unavailable data on antiarrhythmic treatment (7)<br><br>E. r. diltiazem (4)<br>[1.85 mg/kg q12h]<br><br>Amiodarone m. d. (1)<br>[9 mg/kg q24h]<br><br>E. r. diltiazem + amiodarone m. d. (1)<br>[1.5 mg/kg q12h + 10 mg/kg q24h]<br><br>Digoxin + sotalol (1)<br>[0.0017 mg/kg q12h + 1 mg/kg q12h] |

Dig: digoxin; Dig+Dil: digoxin plus diltiazem; E. r.: extended-release diltiazem formulation; m. d.: maintenance dose of amiodarone; OT: other treatment.
